# Supplementary material for: Incisor Occlusion Affects Profile Shape Variation in Middle-Aged Adults
Source: MDPI journal article supplement (doi:10.3390/jcm10040800), 2021-02-17
Supplement: s1 [file s1]

## Supplementary Material

# Incisor occlusion affects profile shape variation in middle-aged adults

Georgios Kanavakis <sup>1,2,3</sup>, Anna-Sofia Silvola <sup>3,4</sup>, Demetrios Halazonetis <sup>5</sup>, Raija Lähdesmäki <sup>3,4</sup>, Pertti Pirttiniemi <sup>3,4</sup>

<sup>1</sup> Department of Pediatric Oral Health and Orthodontics, UZB-University Center for Dental Medicine, University of Basel, Switzerland

<sup>2</sup> Department of Orthodontics and Dentofacial Orthopedics, Tufts University School of Dental Medicine, Boston MA, USA

<sup>3</sup> Oral Development and Orthodontics, Research Unit of Oral Health Sciences, Medical Faculty, University of Oulu, Finland

<sup>4</sup> Oral and Maxillofacial Department, Oulu University Hospital, Medical Research Center Oulu (MRC Oulu)

<sup>5</sup> Department of Orthodontics, School of Dentistry, National and Kapodistrian University of Athens, Greece

\*Correspondence:

Georgios Kanavakis

Department of Pediatric Oral Health and Orthodontics

University Center for Dental Medicine - UZB

Mattenstrasse 40

CH-4058 Basel

Tel: +41 (0) 61 267 26 15

Fax: +41 (0) 61 267 25 81

Email: georgios.kanavakis@unibas.ch; gkanavak@gmail.com

Table S1: Comparison between males and females in overjet and overbite.

|          |         | N   | Mean | SD   | P-value |
|----------|---------|-----|------|------|---------|
| Overjet  | Males   | 799 | 2.90 | 1.90 | < 0.001 |
|          | Females | 955 | 3.25 | 1.91 |         |
| Overbite | Males   | 799 | 3.41 | 2.07 | 0.971   |
|          | Females | 955 | 3.41 | 1.67 |         |

Table S2: Between-subjects effect of overjet and overbite on profile shape variation, as explained by PC1-PC9.

| Profile shape PCs | Variation explained (%) |          | $\eta^2$ | P-value |
|-------------------|-------------------------|----------|----------|---------|
| PC1               | 33.1                    | Overjet  | 0.070    | <0.001  |
|                   |                         | Overbite | 0.013    | <0.001  |
| PC2               | 23.1                    | Overjet  | 0.004    | 0.013   |
|                   |                         | Overbite | 0.035    | <0.001  |
| PC3               | 11                      | Overjet  | 0.006    | 0.002   |
|                   |                         | Overbite | 0.001    | 0.246   |
| PC4               | 6.7                     | Overjet  | 0.049    | <0.001  |
|                   |                         | Overbite | 0.041    | <0.001  |
| PC5               | 5.1                     | Overjet  | 0.000    | 0.620   |
|                   |                         | Overbite | 0.004    | 0.011   |
| PC6               | 4                       | Overjet  | 0.012    | <0.001  |
|                   |                         | Overbite | 0.007    | 0.001   |
| PC7               | 3.2                     | Overjet  | 0.040    | <0.001  |
|                   |                         | Overbite | 0.015    | <0.001  |
| PC8               | 3.1                     | Overjet  | 0.002    | 0.057   |
|                   |                         | Overbite | 0.003    | 0.032   |
| PC9               | 2.2                     | Overjet  | 0.018    | <0.001  |
|                   |                         | Overbite | 0.014    | <0.001  |

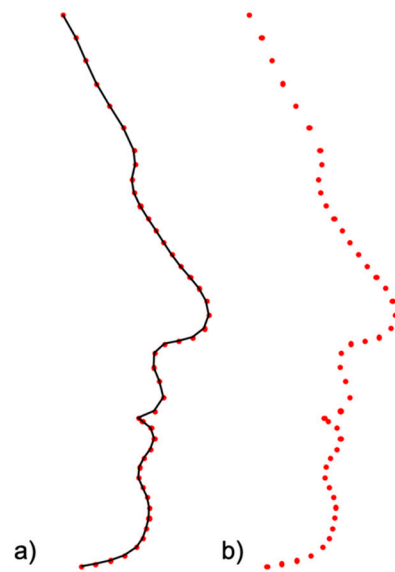

Figure S1: Schematic of the digitization process. The image on the left (a) depicts the upper and lower facial curvatures (black lines) that were placed first, along each profile image. The red dots represent the landmarks that were then positioned along the curves either manually (fixed landmarks) or automatically (semi-landmarks). The image on the right (b) depicts the landmark configuration that was used for all shape analyses as description of facial profile.

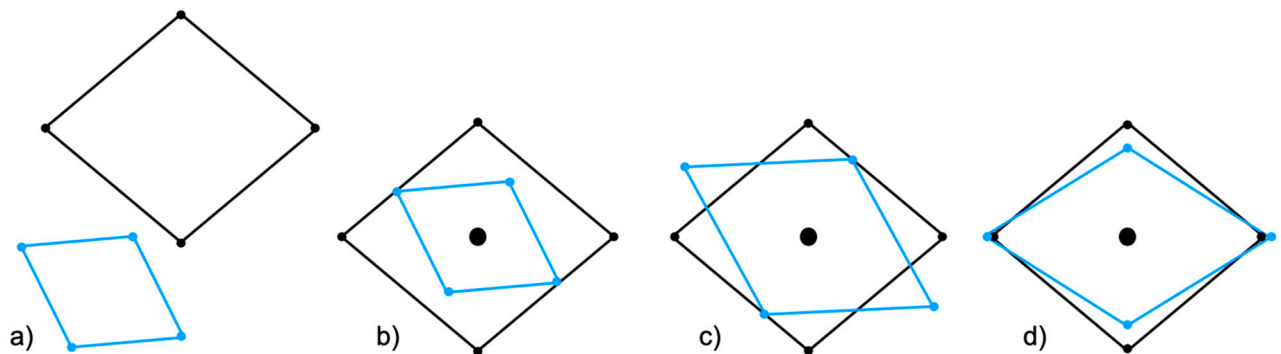

Figure S2: Procrustes Superimposition. To compare the shapes of the black and the blue landmark configurations (a), those are first centered to a common centroid (b). The next step is to scale the two configurations to a fixed centroid size in order to eliminate differences in size. Finally, the two landmark configurations are rotated so that the sum of squared distances between corresponding landmarks is minimized (d). Following these steps, pure shape comparisons between various landmark configurations are enabled.

Note: This schematic is purely descriptive and is meant to support readers' understanding of Procrustes Superimposition.
